# Supplementary material
Source: MDPI journal article supplement (https://www.mdpi.com/1999-4907/13/5/723)
Supplement: s1 [file s1]

Archive with 6 entries (6 files):
- Figure S1.pdf
- Table S1.pdf
- Table S2.pdf
- Table S3.pdf
- Table S4.pdf
- Table S5.pdf
