# Supplementary material
Source: MDPI journal article supplement (https://www.mdpi.com/1999-4907/13/5/723)
Supplement: s1 [file s1 › Table S1.pdf]

**Table S1.** Primer design of Clone, sequence analysis and subcellular localization

| Gene name      | Primer Sequence (5'-3')                        |
|----------------|------------------------------------------------|
| <i>ZjTCP16</i> | Forward:ATGGGGGAGAGCCACCACCAA                  |
|                | Reverse:TCAATGGCGAGAATCAGAGGAAGCA              |
| pSAK277        | Forward:GTGGATCCAAAGAATTCATGGGGGAGAGCCACCACCAA |
| -ZjTCP16-GFP   | Reverse:CTCCTTTACCCATGAATTCATGGCGAGAATCAGAGGA  |
| SAK            | Forward: CATCGAAAGGACAGTAGAAAAGG               |
|                | Reverse: CATTAGAATGAACCGAAACCG                 |
