# Supplementary material
Source: MDPI journal article supplement (https://www.mdpi.com/1999-4907/13/5/723)
Supplement: s1 [file s1 › Table S2.pdf]

**Table S2.** Primer design for qRT-PCR assay

| Gene name      | Primer Sequence (5'-3')                                           |
|----------------|-------------------------------------------------------------------|
| <i>ZjAS1</i>   | Forward:GGCAAGTGGTGGGAAGTGTT<br>Reverse:AGGCTGGGGCAGGGTG          |
| <i>ZjAS2</i>   | Forward:GGCTCCGCCAAGTCCAG<br>Reverse:CCGCCGCCCTGAGAAA             |
| <i>ZjLOB</i>   | Forward:CGGAAGCGAGGGTTAGAGAC<br>Reverse:ATTAATGGCTGAGGAGGCGG      |
| <i>ZjKNAT1</i> | Forward:ATGATGATGTGGGTGTTGATTTT<br>Reverse:TCTGGATAACGAGGATGATTGG |
| <i>ZjKNAT2</i> | Forward:AGTCCCGTTTCGGATTTTCG<br>Reverse:TCTTTTGGCAATTTCCCTTTC     |
| <i>ZjKNAT6</i> | Forward: AGAAAGGAAAGCTCCCCAAGG<br>Reverse: CCCGAAATACCATCCATCACAT |
| <i>Actin</i>   | Forward: CTTGCATCCCTCAGCACCTT<br>Reverse: TCCTGTGGACAATGGATGGA    |
