# Supplementary material
Source: MDPI journal article supplement (https://www.mdpi.com/1999-4907/13/5/723)
Supplement: s1 [file s1 › Table S3.pdf]

**Table S3.** Primer design of transgenic plants generation and detection

| Gene name               | Primer Sequence (5'-3')                    |
|-------------------------|--------------------------------------------|
|                         | Forward:                                   |
| pSAK277- <i>ZjTCP16</i> | TCCAAAGAATTCCCCGGTACCATGGGGGAGAGCCACCACCAA |
|                         | Reverse:                                   |
|                         | ATGATCTTTGTAATCCTCGAGATGGCGAGAATCAGAGGA    |
| SAK                     | Forward: CATCGAAAGGACAGTAGAAAAGG           |
|                         | Reverse: CATTAGAATGAACCGAAACCG             |
| Cas9- <i>zjtcp16</i>    | Forward: TGCAAACCTCGACGATCTCCCCC           |
|                         | Reverse: AAACGGGGGGGAGATCGTCGAGGTT         |
| Cas9                    | Forward: TGTCCCAGGATTAGAATGATTAGGC         |
|                         | Reverse: TATTG GTTTA TCTCA TCGGA ACTGC     |
| Off-target site1        | Forward: TGGGAAGCCAAGTAATCGCATAGAT         |
|                         | Reverse: TAACCATCCACGTCGTCACCGTTC          |
| Off-target site2        | Forward: AGCCCCAAAATGGTGGAGGAGGAGCTACT     |
|                         | Reverse:                                   |
|                         | ACCCAAATACTCTGCCGCAACTACAGAATACCTCGATCC    |
|                         | Forward: ACTACATGTCTCTGCTGCCG              |
| Off-target site3        | Reverse:                                   |
|                         | GGGAGTGAGATAATGGCCCAGAGTCTTACAAATTACC      |
