# Supplementary material
Source: MDPI journal article supplement (https://www.mdpi.com/1999-4907/13/5/723)
Supplement: s1 [file s1 › Table S4.pdf]

**Table S4.** Primer design for Y1H and Y2H

| Gene name      | Primer Sequence (5'-3')                                       |
|----------------|---------------------------------------------------------------|
| AD-ZjTCP16     | Forward:GTACCAGATTACGCTCATATGATGGGGGAGAGCCA<br>CCACCAA        |
|                | Reverse:ACGATTCATCTGCAGCTCGAGATGGCGAGAATCAG<br>AGGA           |
| AD-ZjAS2       | Forward:GTACCAGATTACGCTCATATGATGTCGTCGTCGTCT<br>TCGTC         |
|                | Reverse:ACGATTCATCTGCAGCTCGAGTCAGCCTTGTTTCAGA<br>TGATTTAT     |
| BD-ZjTCP16     | Forward:GAGGAGGACCTGCATATGATGGGGGAGAGCCACC<br>ACCAA           |
|                | Reverse:ACGGATCCCCGGGAATTCATGGCGAGAATCAGAGG<br>A              |
| BD-ZjLOB       | Forward:GAGGAGGACCTGCATATGATGCCAGGTTGCATCTT<br>CGCACCA        |
|                | Reverse:ACGGATCCCCGGGAATTCTCACATATTTCCATCTCC<br>T             |
| pB42AD-ZjTCP16 | Forward:GATTATGCCTCTCCCGAATTCATGGGGGAGAGCCA<br>CCACCAA        |
|                | Reverse:AGAAGTCCAAAGCTTCTCGAGTTCAATGGCGAGAA<br>TCAGAGGA       |
| pB42AD-ZjAS1   | Forward:GATTATGCCTCTCCCGAATTCATGAAGGAGAGACA<br>ACGTTGG        |
|                | Reverse:AGAAGTCCAAAGCTTCTCGAGCTACCGGCCATTAG<br>GCTCAGC        |
| pB42AD-ZjAS2   | Forward:GATTATGCCTCTCCCGAATTCATGTCGTCGTCGTCT<br>TCGTC         |
|                | Reverse:AGAAGTCCAAAGCTTCTCGAGTCAGCCTTGTTTCAGA<br>TGATTTAT     |
| pB42AD-ZjLOB   | Forward:GATTATGCCTCTCCCGAATTCATGCCAGGTTGCATC<br>TTCGCACCA     |
|                | Reverse:AGAAGTCCAAAGCTTCTCGAGTCACATATTTCCATC<br>TCCT          |
| pB42AD-ZjKNAT1 | Forward:GATTATGCCTCTCCCGAATTCATGGAAGAGTTTTAC<br>AGGG          |
|                | Reverse:AGAAGTCCAAAGCTTCTCGAG<br>CTAAAAATGAATAATTAATAA        |
| pB42AD-ZjKNAT2 | Forward:GATTATGCCTCTCCCGAATTCCATATGATGGAGGA<br>ATATAATCAAATGG |
|                | Reverse:AGAAGTCCAAAGCTTCTCGAGGAATTCTGGGCCTA<br>GACGGTAATGAC   |

|                |                                                                 |
|----------------|-----------------------------------------------------------------|
| pB42AD-ZjKNAT6 | Forward:GATTATGCCTCTCCCGAATTCCATATGAGAAGATA<br>AAAAAAGCCTCC     |
|                | Reverse:AGAAGTCCAAAGCTTCTCGAGGAATTCCACCTCAA<br>TGATCGTTTGTG     |
| pLaczi-ZjTCP16 | Forward:CTTGAATTCGAGCTCGGTACCGACAGATGGCCAAG<br>TACCACATTTTGGTGG |
|                | Reverse:TGCCTCGAGGTGCGACTGATTGAGCTTTACTCAACCC<br>GAAGTTATCTCTC  |
| pLaczi-ZjAS1   | Forward:CTTGAATTCGAGCTCGGTACCCAGAGTCGTTCCGG<br>TTATAAGAGTTAAAA  |
|                | Reverse:TGCCTCGAGGTGCGACTTCCAGGTGCAAACATCACC<br>ATTGCCGCAAACCTT |
| pLaczi-ZjAS2   | Forward:CTTGAATTCGAGCTCGGTACCCATGACATCTCTTAC<br>ATGAAT          |
|                | Reverse:TGCCTCGAGGTGCGACCTGAACAAGGCTGAGGAGGA<br>A               |
| pLaczi-ZjLOB   | Forward:CTTGAATTCGAGCTCGGTACCTGTAGGAGCTTGAT<br>GAAGCAAA         |
|                | Reverse:TGCCTCGAGGTGCGACTATACTGATTTATCATTCA                     |
| pLaczi-ZjKNAT1 | Forward:CTTGAATTCGAGCTCGGTACCAATGAAGAGTGGTA<br>TATTCAGCG        |
|                | Reverse:TGCCTCGAG<br>GTCGACAAGTATAGTGAGAGAGTGTGAG               |
| pLaczi-ZjKNAT2 | Forward:CTTGAATTCGAGCTCGGTACCTCTCCCTGTTTAACA<br>ATTTGTAC        |
|                | Reverse:TGCCTCGAG GTCGAC<br>TACCGTCTAGGCCCATGAGAGAAC            |
| pLaczi-ZjKNAT6 | Forward:CTTGAATTCGAGCTCGGTACCGATATTTGTAGAAAT<br>AAAGGT          |
|                | Reverse:TGCCTCGAGGTGCGACTGAGGTGCATGTACATTCTTC<br>AAT            |
| pGADT7         | Forward: ATGAAGATACCCCACCAAACC<br>Reverse: TTGCGGGGTTTTTCAGTATC |
| pGBKT7         | Forward:TTACGCTCATATGATGATGTTT                                  |
|                | Reverse: GCCCAGCCGGGTGCAATATGAAA                                |
| pB42AD         | Reverse:GTGCCAGATTATGCCTCTCCC                                   |
|                | Forward:GAGACTTGACCAAACCTCTGGC                                  |
| placzi         | Reverse:GAATTCGAGCTCGGTACCC                                     |
|                | Forward:GGACCTAATGTATAAGGAAAG                                   |

---
