# Supplementary material
Source: MDPI journal article supplement (https://www.mdpi.com/1999-4907/13/5/723)
Supplement: s1 [file s1 › Table S5.pdf]

**Table S5.** Primer design for BiFC assays

| Gene name    | Primer Sequence (5'-3')                                  |
|--------------|----------------------------------------------------------|
| BIFC-ZjTCP16 | Forward:AGTGGTCTCTGTCCAGTCCTATGGGGGAGAGCCAC<br>CACCAA    |
|              | Reverse:GGTCTCAGCAGACCACAAGTATGGCGAGAATCAGA<br>GGA       |
| BIFC-ZjAS2   | Forward:AGTGGTCTCTGTCCAGTCCTATGTCGTCGTCGTCTT<br>CGTC     |
|              | Reverse:GGTCTCAGCAGACCACAAGTTCAGCCTTGTTTCAGAT<br>GATTTAT |
| BIFC-ZjLOB   | Forward:AGTGGTCTCTGTCCAGTCCTATGCCAGGTTGCATCT<br>TCGCACCA |
|              | Reverse:GGTCTCAGCAGACCACAAGTTCACATATTTCCATCT<br>CCT      |
| pNC-BiFC-Ecn | Forward:CATGGTCCTGCTGGAGTTCGTG                           |
|              | Reverse:TTATCTGGGAACTACTCACAC                            |
| pNC-BiFC-Enn | Forward:TCATGGCCGACAAGCAGAAG                             |
|              | Reverse:TTATCTGGGAACTACTCACAC                            |
